# Supplementary material for: Insights into the structure and thermal stability of uranyl aluminate nanoparticles
Source: Royal Society of Chemistry journal article supplement (doi:10.1039/c6nj02948e), 2017-01-01

## New Journal of Chemistry

### Electronic Supplementary Information

# Insights into the structure and thermal stability of uranyl aluminate nanoparticles

Tony Chave, Xavier Le Goff, Andreas C. Scheinost, and Sergey I. Nikitenko

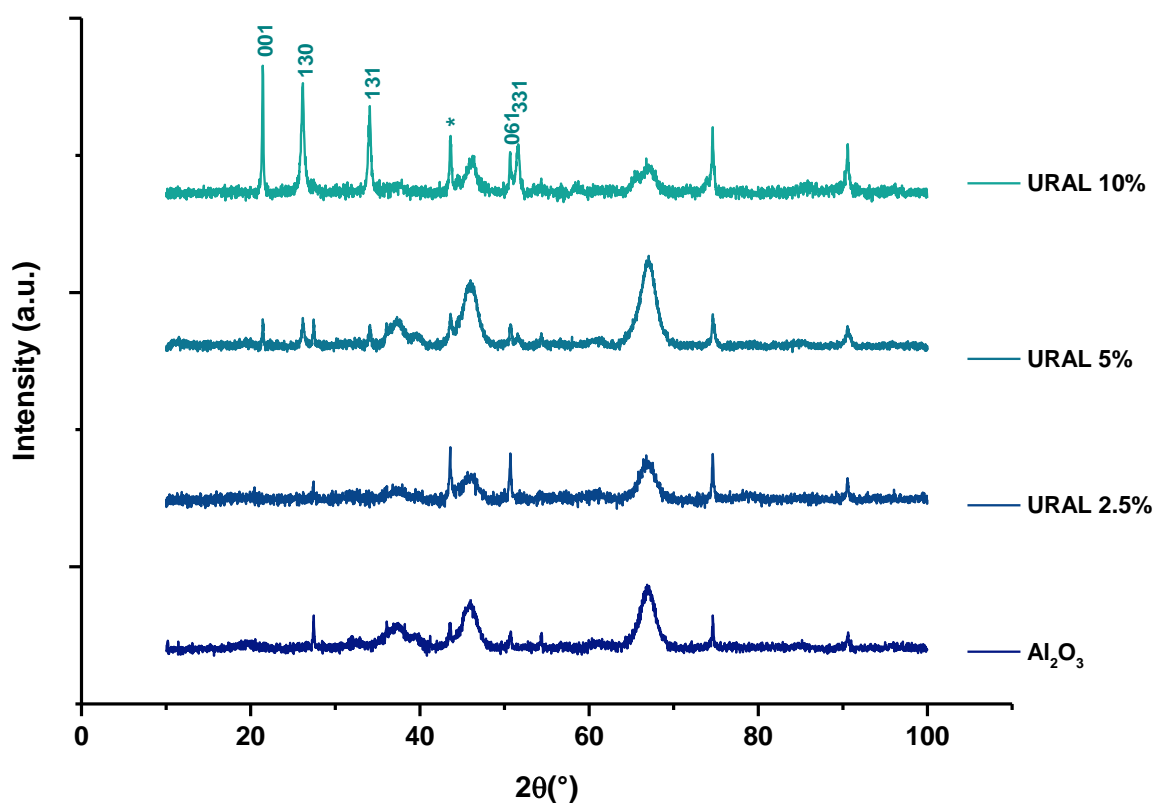

Fig. S1 XRD patterns obtained for URAL samples from 0 to 10% of added uranium after ultrasonically assisted uranium precipitation and calcination at  $800^{\circ}\text{C}$ .  $\alpha$ - $\text{U}_3\text{O}_8$  main indices of lattice planes (PDF 00-047-1493) are given as labels on URAL 10% diffraction diagram.

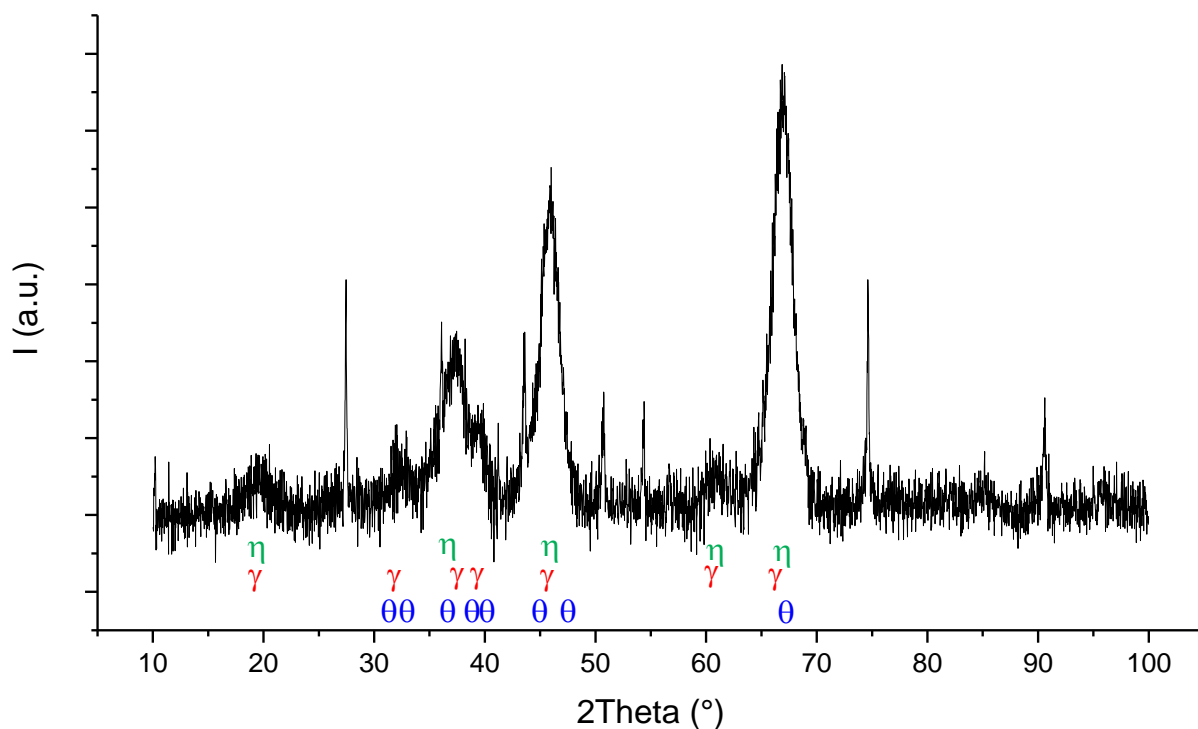

Fig. S2 XRD patterns of  $\text{Al}_2\text{O}_3$  calcined at  $800^\circ\text{C}$  after synthesis procedure. Main diffraction peaks of  $\theta\text{-Al}_2\text{O}_3$  (PDF 00-023-1009),  $\gamma\text{-Al}_2\text{O}_3$  (PDF 00-050-0741) and  $\eta\text{-Al}_2\text{O}_3$  (PDF 01-079-1557) are given for comparison.

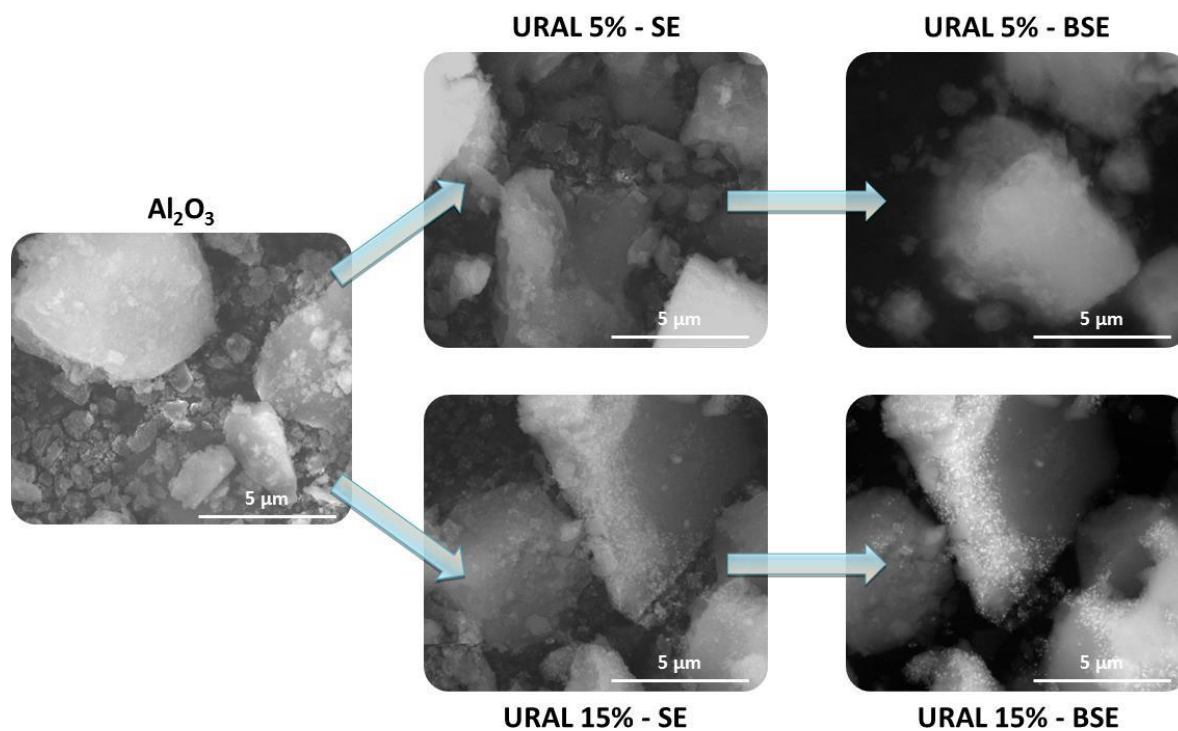

Fig. S3 Secondary electron (SE) and back-scattered electron (BSE) SEM images of URAL samples obtained without addition of uranium ( $\text{Al}_2\text{O}_3$ ) and in presence of respectively 5% and 15% of uranium.

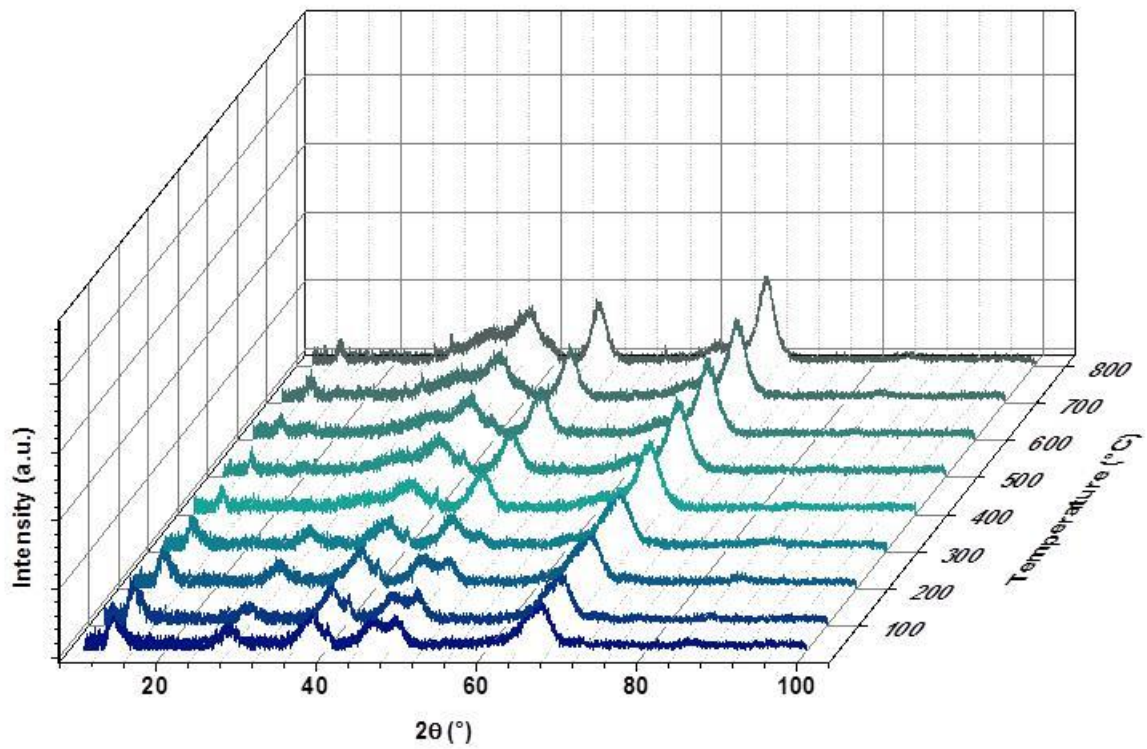

Fig. S4 XRD pattern evolution in temperature of URAL 5% sample prior calcination starting from 30°C to 800°C (from bottom to top)

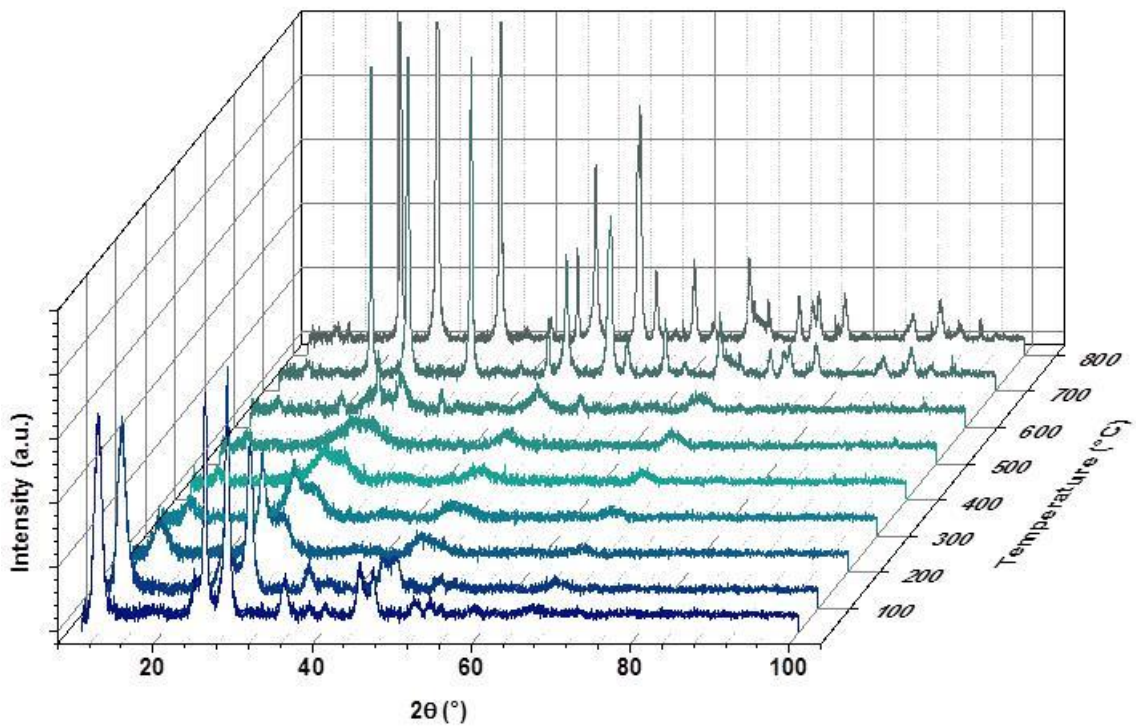

Fig. S5 XRD pattern evolution in temperature of URAL 25% sample prior calcination starting from 30°C to 800°C (from bottom to top).

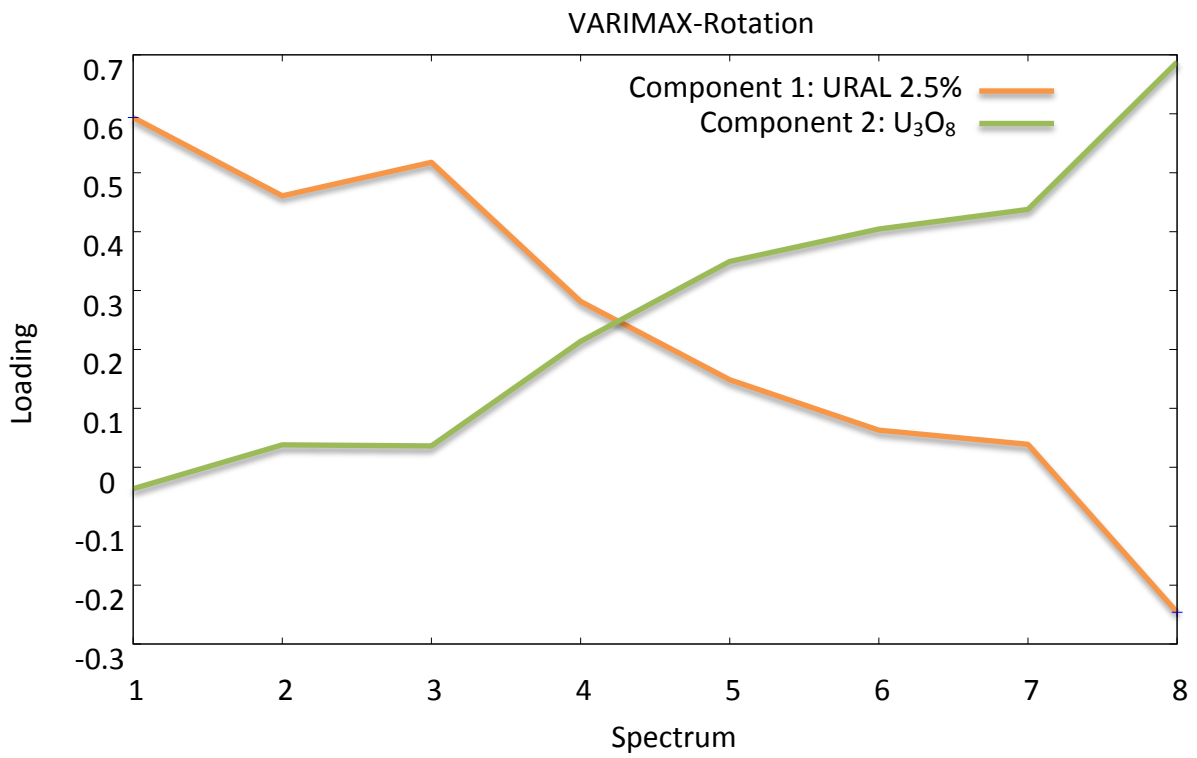

Fig. S6 Loadings of component 1 and 2 for the EXAFS spectra of samples URAL 2.5 to 25% (Spectra 1 to 7) with URAL 25% 500°C (Spectrum 3) and of U<sub>3</sub>O<sub>8</sub> (spectrum 8).

**Appendix: Diffraction data of observed phases**

**Table S1 XRD PDF data sheets with d-spacings, relative intensities and  $2\theta$  (Cu K $\alpha$ ) as well as indices of lattice planes are given for  $\alpha$ -U<sub>3</sub>O<sub>8</sub>, ammonium diuranate and  $\beta$ -UO<sub>3</sub>**

| <b><math>\alpha</math>-U<sub>3</sub>O<sub>8</sub> (PDF 00-047-1493)</b> |                             |                  |          |          |          |
|-------------------------------------------------------------------------|-----------------------------|------------------|----------|----------|----------|
| <b>d(Å)</b>                                                             | <b><math>2\theta</math></b> | <b>Intensity</b> | <b>h</b> | <b>k</b> | <b>l</b> |
| 4.146                                                                   | 21.42                       | 94               | 0        | 0        | 1        |
| 3.428                                                                   | 25.97                       | 100              | 1        | 3        | 0        |
| 3.358                                                                   | 26.52                       | 56               | 2        | 0        | 0        |
| 2.642                                                                   | 33.90                       | 74               | 1        | 3        | 1        |
| 2.609                                                                   | 34.35                       | 37               | 2        | 0        | 1        |
| 2.073                                                                   | 43.63                       | 19               | 0        | 0        | 2        |
| 1.993                                                                   | 45.47                       | 14               | 0        | 6        | 0        |
| 1.952                                                                   | 46.49                       | 22               | 3        | 3        | 0        |
| 1.796                                                                   | 50.80                       | 16               | 0        | 6        | 1        |
| 1.774                                                                   | 51.47                       | 27               | 1        | 3        | 2        |
| 1.766                                                                   | 51.72                       | 50               | 3        | 3        | 1        |
| 1.714                                                                   | 53.41                       | 14               | 2        | 6        | 0        |
| 1.584                                                                   | 58.20                       | 17               | 2        | 6        | 1        |
| 1.421                                                                   | 65.65                       | 17               | 3        | 3        | 2        |

  

| <b>Ammonium Diuranate (PDF 00-044-0069)</b> |                             |                  |          |          |          |
|---------------------------------------------|-----------------------------|------------------|----------|----------|----------|
| <b>d(Å)</b>                                 | <b><math>2\theta</math></b> | <b>Intensity</b> | <b>h</b> | <b>k</b> | <b>l</b> |
| 7.252                                       | 12.20                       | 100              | 0        | 0        | 2        |
| 3.630                                       | 24.51                       | 22               | 0        | 0        | 4        |
| 3.522                                       | 25.27                       | 60               | 2        | 2        | 0        |
| 3.169                                       | 28.14                       | 70               | 2        | 2        | 2        |
| 2.527                                       | 35.50                       | 18               | 2        | 2        | 4        |
| 2.033                                       | 45.51                       | 10               | 2        | 2        | 6        |
| 1.991                                       | 44.53                       | 10               | 6        | 0        | 0        |
| 1.957                                       | 46.36                       | 11               | 6        | 0        | 2        |

  

| <b><math>\beta</math>-UO<sub>3</sub> (PDF 01-071-2124)</b> |                             |                  |          |          |          |
|------------------------------------------------------------|-----------------------------|------------------|----------|----------|----------|
| <b>d(Å)</b>                                                | <b><math>2\theta</math></b> | <b>Intensity</b> | <b>h</b> | <b>k</b> | <b>l</b> |
| 4.810                                                      | 18.43                       | 51               | 2        | 1        | 0        |
| 3.583                                                      | 24.83                       | 85               | 0        | 4        | 0        |
| 3.438                                                      | 25.90                       | 29               | 1        | 0        | 1        |
| 3.404                                                      | 26.16                       | 34               | 0        | 2        | 1        |
| 3.100                                                      | 28.78                       | 40               | 1        | 2        | 1        |
| 3.075                                                      | 29.02                       | 43               | 3        | 2        | 0        |
| 3.029                                                      | 29.46                       | 100              | -2       | 2        | 1        |
| 1.943                                                      | 46.71                       | 23               | -2       | 6        | 1        |
| 1.918                                                      | 47.36                       | 27               | 4        | 2        | 1        |

Table S2 XRD PDF data sheets with d-spacings, relative intensities and  $2\theta$  (Cu K $\alpha$ ) as well as indices of lattice planes are given for  $\gamma$ -Al<sub>2</sub>O<sub>3</sub>,  $\theta$ -Al<sub>2</sub>O<sub>3</sub> and  $\eta$ -Al<sub>2</sub>O<sub>3</sub>

| <b><math>\gamma</math>-Al<sub>2</sub>O<sub>3</sub>(PDF 00-050-0741)</b> |                             |                  |          |          |          |
|-------------------------------------------------------------------------|-----------------------------|------------------|----------|----------|----------|
| <b>d(Å)</b>                                                             | <b>2<math>\theta</math></b> | <b>Intensity</b> | <b>h</b> | <b>k</b> | <b>l</b> |
| 4.584                                                                   | 19.35                       | 50               | 1        | 1        | 1        |
| 2.807                                                                   | 31.86                       | 75               | 2        | 2        | 0        |
| 2.394                                                                   | 37.54                       | 90               | 3        | 1        | 1        |
| 2.292                                                                   | 39.28                       | 30               | 2        | 2        | 2        |
| 1.985                                                                   | 45.67                       | 100              | 4        | 0        | 0        |
| 1.621                                                                   | 56.75                       | 50               | 4        | 2        | 2        |
| 1.528                                                                   | 60.55                       | 75               | 5        | 1        | 1        |
| 1.403                                                                   | 66.60                       | 100              | 4        | 4        | 0        |
| 1.146                                                                   | 84.47                       | 30               | 4        | 4        | 4        |

  

| <b><math>\theta</math>-Al<sub>2</sub>O<sub>3</sub>(PDF 00-023-1009)</b> |                             |                  |          |          |          |
|-------------------------------------------------------------------------|-----------------------------|------------------|----------|----------|----------|
| <b>d(Å)</b>                                                             | <b>2<math>\theta</math></b> | <b>Intensity</b> | <b>h</b> | <b>k</b> | <b>l</b> |
| 2.837                                                                   | 31.51                       | 80               | -4       | 0        | 1        |
| 2.730                                                                   | 32.78                       | 65               | 0        | 0        | 2        |
| 2.444                                                                   | 36.74                       | 60               | 1        | 1        | 1        |
| 2.315                                                                   | 38.87                       | 45               | 4        | 0        | 1        |
| 2.257                                                                   | 39.91                       | 35               | 2        | 0        | 2        |
| 2.019                                                                   | 44.86                       | 45               | -1       | 1        | 2        |
| 1.909                                                                   | 47.59                       | 30               | 6        | 0        | 0        |
| 1.543                                                                   | 59.91                       | 25               | -3       | 1        | 3        |
| 1.488                                                                   | 62.34                       | 25               | 1        | 1        | 3        |
| 1.453                                                                   | 64.05                       | 25               | 0        | 2        | 0        |
| 1.388                                                                   | 67.40                       | 100              | 4        | 0        | 3        |

  

| <b><math>\eta</math>-Al<sub>2</sub>O<sub>3</sub>(PDF 01-079-1557)</b> |                             |                  |          |          |          |
|-----------------------------------------------------------------------|-----------------------------|------------------|----------|----------|----------|
| <b>d(Å)</b>                                                           | <b>2<math>\theta</math></b> | <b>Intensity</b> | <b>h</b> | <b>k</b> | <b>l</b> |
| 4.569                                                                 | 19.41                       | 43               | 1        | 1        | 1        |
| 2.386                                                                 | 37.67                       | 44               | 3        | 1        | 1        |
| 2.285                                                                 | 39.41                       | 18               | 2        | 2        | 2        |
| 1.979                                                                 | 45.83                       | 76               | 4        | 0        | 0        |
| 1.816                                                                 | 50.21                       | 11               | 3        | 3        | 1        |
| 1.523                                                                 | 60.76                       | 22               | 5        | 1        | 1        |
| 1.399                                                                 | 66.82                       | 100              | 4        | 4        | 0        |
| 1.338                                                                 | 70.32                       | 12               | 5        | 3        | 1        |
| 0.885                                                                 | 121.05                      | 10               | 8        | 4        | 0        |
| 0.808                                                                 | 144.98                      | 23               | 8        | 4        | 4        |

Appendix: Full size TEM images

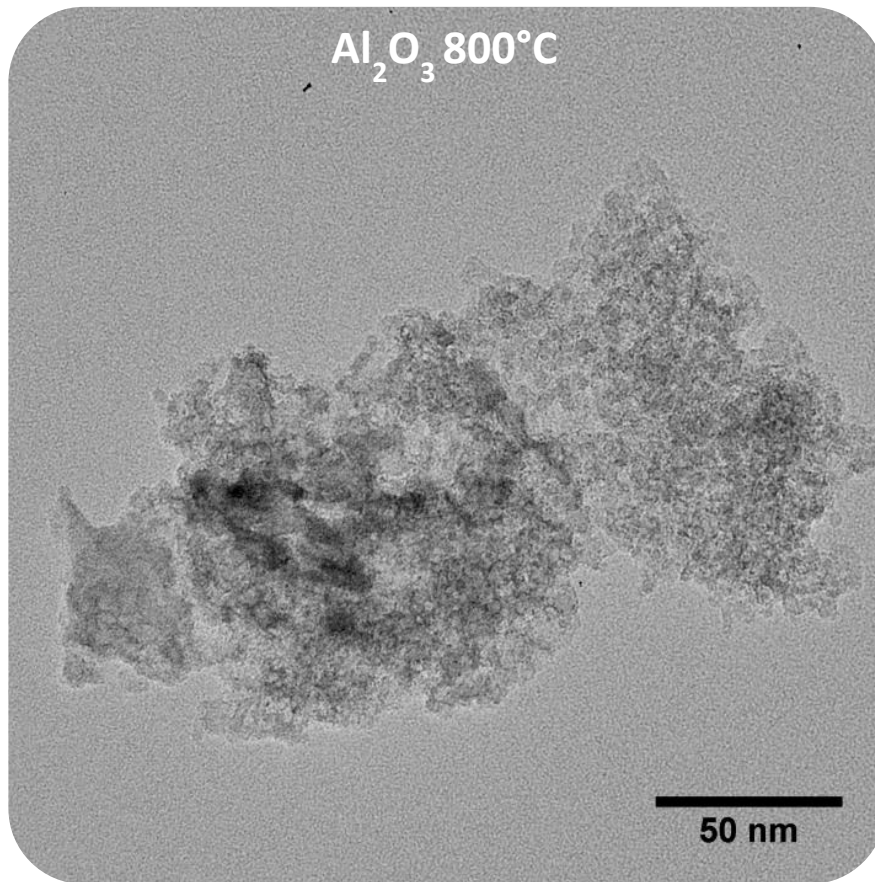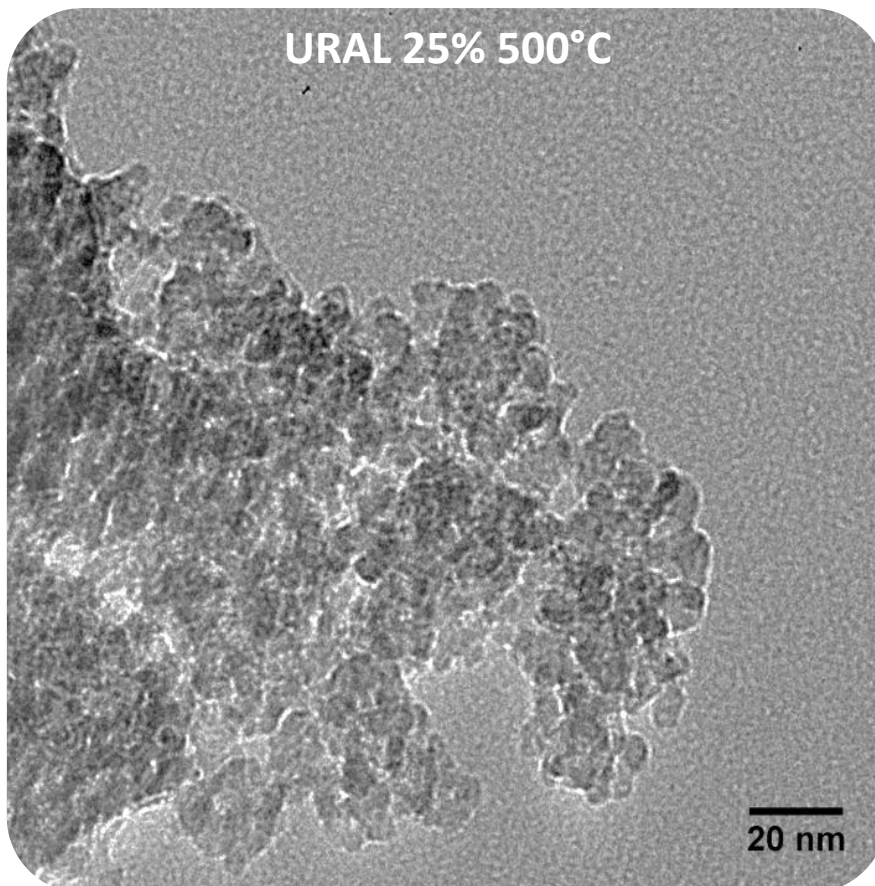

URAL 5% 800°C

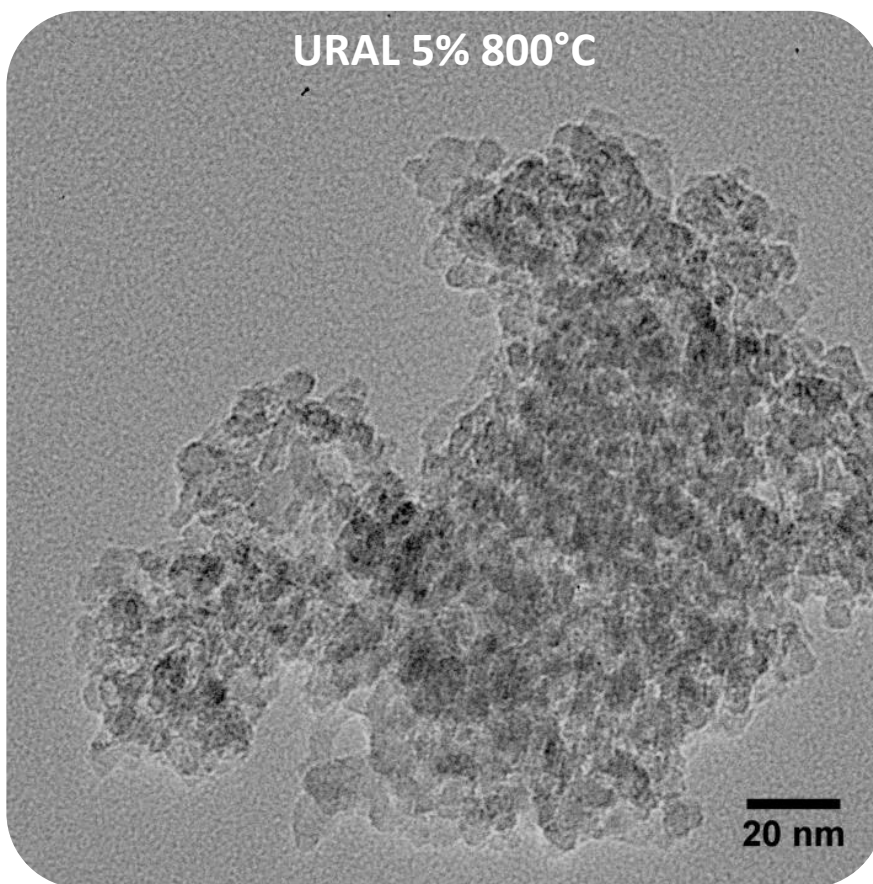

URAL 20% 800°C

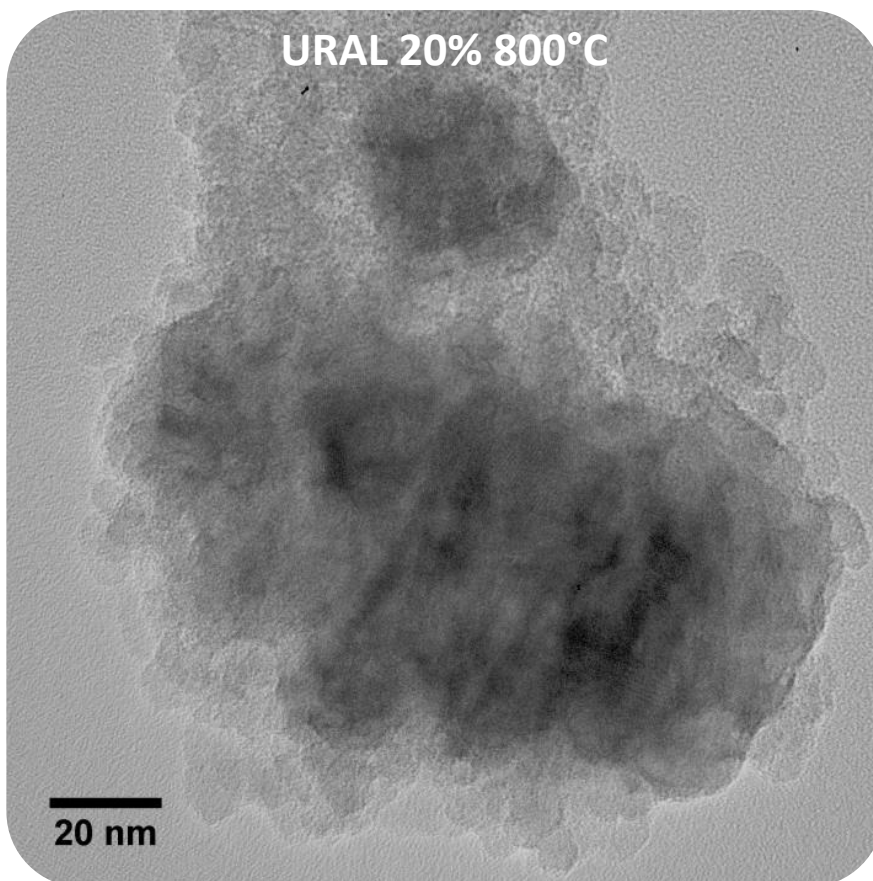



URAL 25% 500°C

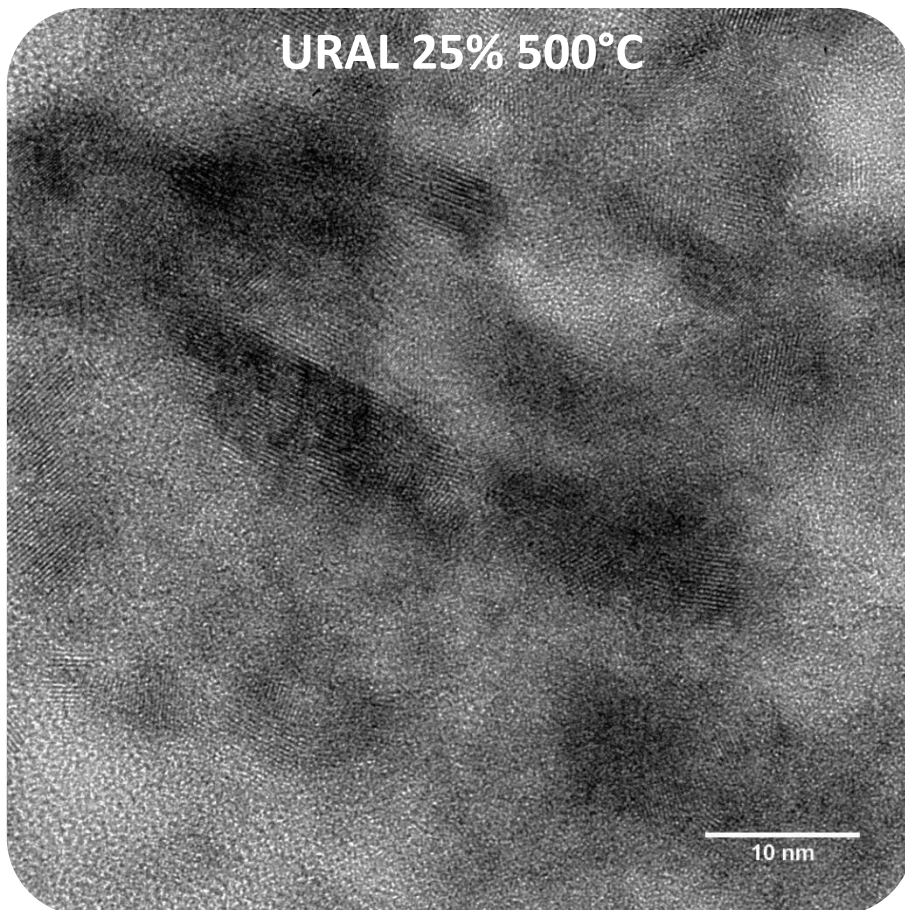

URAL 5% 800°C

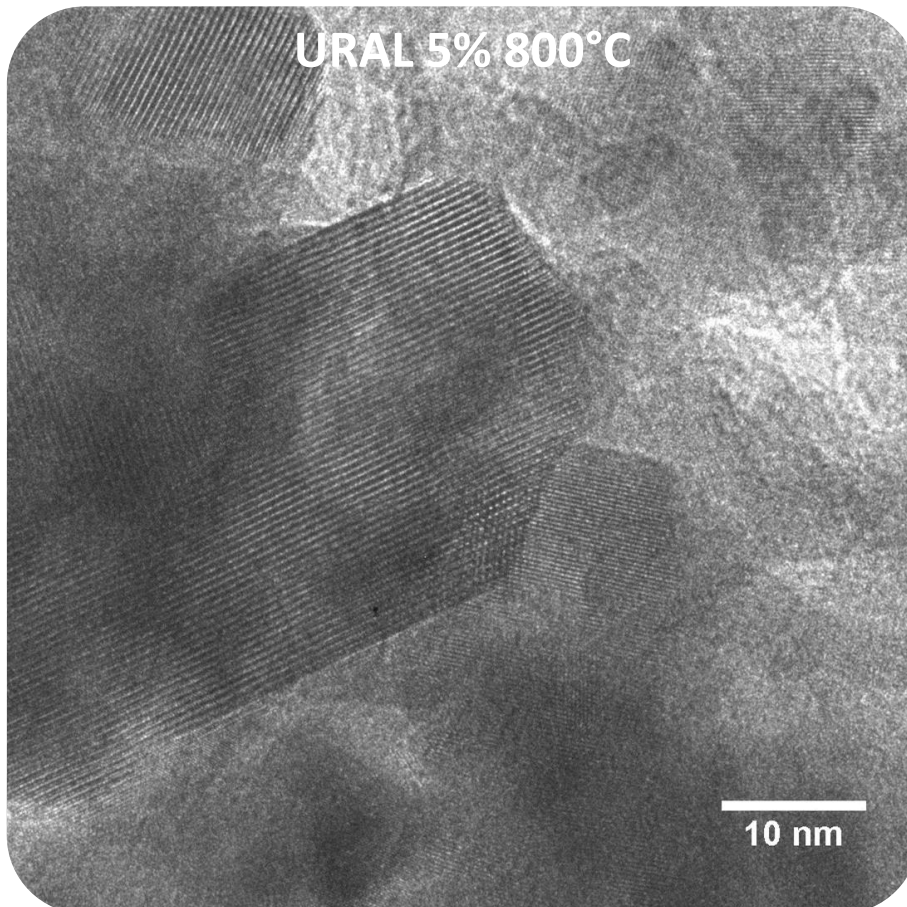

Supplement: c6nj02948e1.pdf [file c6nj02948e1.pdf]
